# Supplementary material
Source: PubMed Central journal article supplement (PMC4260592)
Supplement: pnas.201419119SI.pdf [file pnas.201419119SI.pdf]

# Supporting Information

Yueh et al. 10.1073/pnas.1419119111

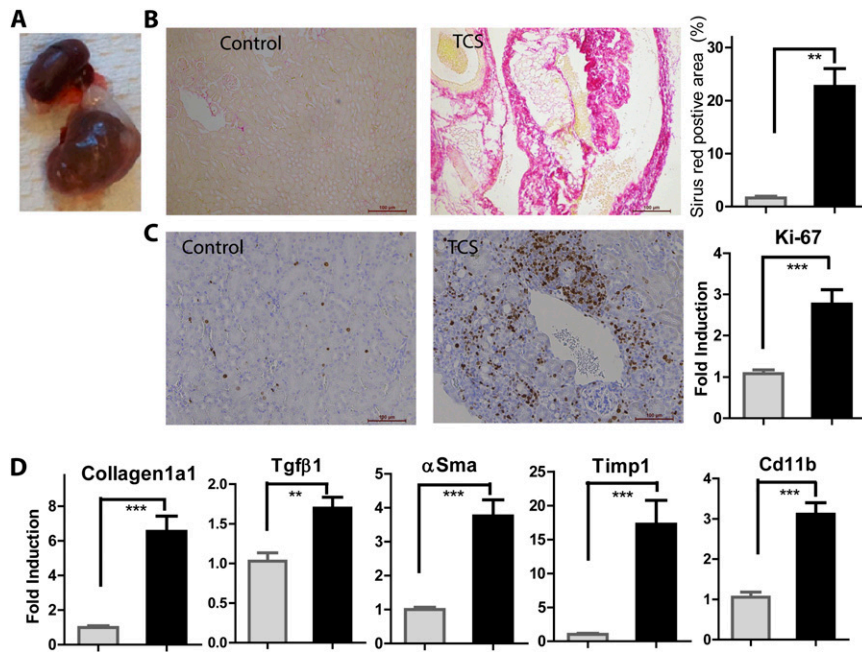

**Fig. S1.** TCS treatment induces kidney fibrosis in mice. Following 8-mo treatment with a chow diet containing 0.08% TCS, 8.3% of mice developed kidney fibrosis. Comparisons were made between fibrotic ( $N = 3$ ) and nondiseased kidneys ( $N = 3$ ). (A) A normal (*Top*) and enlarged fibrotic kidney (*Bottom*) from TCS-treated mice (B) Expression of Ki-67 was determined by immunohistochemistry and real time PCR. (C) Collagen deposition was examined by Sirius red staining (*Left*) and its quantification (*Right*). (D) Expression of genes relevant to renal fibrosis, including *Collagen 1a1*, *Tgfb1*,  $\alpha$ *Sma*, *Timp1*, and *Cd11b*, detected by real-time PCR. ( $P$  values  $< 0.05$  were considered statistically significant;  $*P < 0.05$ ,  $**P < 0.005$ ,  $***P < 0.005$ .)

**Table S1. List and sequence of primers used for real time-PCR**

| Primer                 | Sequence                         |
|------------------------|----------------------------------|
| CPH fwd                | 5'-AGACGCCACTGTCGCTT-3'          |
| CPH rev                | 5'-GTCTTTGGAACCTTTGTCTGCAA-3'    |
| HO-1 fwd               | 5'-CAGGTGTCCAGAGAAGGCTTT-3'      |
| HO-1 rev               | 5'-TCTTCCAGGGCCGTGTAGAT-3'       |
| NQO1 rev               | 5'-GCAGGATGCCACTCTGAATC-3'       |
| NQO1 fwd               | 5'-GGTGATATTTTCAGTCCCATTGC-3'    |
| GSTA1 fwd              | 5'-CAGCCTCCCCAATGTGAAGAA-3'      |
| GSTA1 rev              | 5'-TGGCTCCATCAATGCAGCTT-3'       |
| CYP2B10 fwd            | 5'-ACTCCGACTTCGTCCACCT-3'        |
| CYP2B10 rev            | 5'-GGCTCAATGGTCATGTGGCA-3'       |
| K <sub>i</sub> -67 fwd | 5'-AGAGCCTTAGCAATAGCAACG-3'      |
| K <sub>i</sub> -67 rev | 5'-GTCTCCCGGATTCTCTG-3'          |
| CD45 fwd               | 5'-GCTCAAACCTTCTGGCCTTTG-3'      |
| CD45 rev               | 5'-AAGAGTTGTGAGGCTGGCAC-3'       |
| c-Myc fwd              | 5'-AGAGCTCCTCGAGCTGTTT-3'        |
| c-Myc rev              | 5'-TGAAGTTCACGTTGAGGG-3'         |
| CYCLIND1 fwd           | 5'-TCCTCTCCAAAATGCCAGAG-3'       |
| CYCLIND1 rev           | 5'-GGGTGGGTTGGAAATGAAC-3'        |
| AFP fwd                | 5'-CTTCCCTCATCCTCCTGTAC-3'       |
| AFP rev                | 5'-ACAAACTGGGTAAAGGTGATGG-3'     |
| IGF2 fwd               | 5'-TGAGAAGCACCAACATCGAG-3'       |
| IGF2 rev               | 5'-CTTCTCCTCCGATCCTCCTG-3'       |
| DLK1 fwd               | 5'-TGTGCAGGAGCATTCGTACT-3'       |
| DLK1 rev               | 5'-CGGGAAATCTGCGAAATAG-3'        |
| CXCR2 fwd              | 5'-ATGCCCTCTATTCTGCCAGAT-3'      |
| CXCR2 rev              | 5'-GTGCTCCGGTTGTATAAGATGAC-3'    |
| TNF $\alpha$ fwd       | 5'-CATCTTCTCAAAAATTCGAGTGACAA-3' |
| TNF $\alpha$ rev       | 5'-TGGGAGTAGACAAGGTACAACCC-3'    |
| IL-6 fwd               | 5'-GAGGATACCACTCCCAACAGACC-3'    |
| IL-6 rev               | 5'-AAGTGCATCATCGTTGTTTCATA-3'    |
| COL1A1 fwd             | 5'-TAGGCCATTGTGTATGCAGC-3'       |
| COL1A1 rev             | 5'-ACATGTTTCAGCTTTGTGGACC-3'     |
| $\alpha$ -SMA fwd      | 5'-GTTTCAGTGGTGCCCTCTGTCA-3'     |
| $\alpha$ -SMA rev      | 5'-ACTGGGACGACAGGAAAAG-3'        |
| TGF $\beta$ 1 fwd      | 5'-GTGGAAATCAACGGGATCAG-3'       |
| TGF $\beta$ 1 rev      | 5'-ACTTCCAACCCAGGTCCTTC-3'       |
| TIMP1 fwd              | 5'-AGGTGGTCTCGTTGATTTCT-3'       |
| TIMP1 rev              | 5'-GTAAGGCCTGTAGCTGTGCC-3'       |
| gp91phox fwd           | 5'-TGTGGTTGGGGCTGAATGTC-3'       |
| gp91phox rev           | 5'-CTGAGAAAGGAGAGCAGATTT-3'      |
| p47phox fwd            | 5'-CTATCTGGAGCCCCCTTGACA-3'      |
| p47phox rev            | 5'-TCCTCTTCAACAGCAGCGTA-3'       |
| p67phox fwd            | 5'-GCTGCGTGAACACTATCCTGG-3'      |
| p67phox rev            | 5'-AGGTCGTACTTCTCATTCTG-3'       |

fwd, forward; rev, reverse.
